# Supplementary material for: Vibrio aestuarianus clade A and clade B isolates are associated with Pacific oyster (Magallana gigas) disease outbreaks across Ireland
Source: PubMed Central journal article supplement (PMC10483421; doi:10.1099/mgen.0.001078), 2023-08-04
Supplement: mgen-9-1078-s001.pdf [file mgen-9-1078-s001.pdf]

# **Supplementary materials for “*Vibrio aestuarianus* Clade A and Clade B isolates are associated with Pacific oyster (*Magallana gigas*) disease outbreaks across Ireland”**

## **Supplementary tables:**

**Table S1: Data source information and quality control values for sequencing data used in this study.**

**Table S2: Metadata for publicly available data.**

**Table S3: Gene families unique to Clade A isolates as seen in genome 12142.**  
Genes are displayed in order of appearance in each contig. Nineteen co-localised blocks of gene families are shown.

**Table S4: PHAST results for genome 12142.**

**Table S5: Gene families unique to Clade B isolates as seen in genome 16060.**  
Genes are displayed in order of appearance in each contig. Twenty-two co-localised blocks of gene families are shown.

## Supplementary figures:

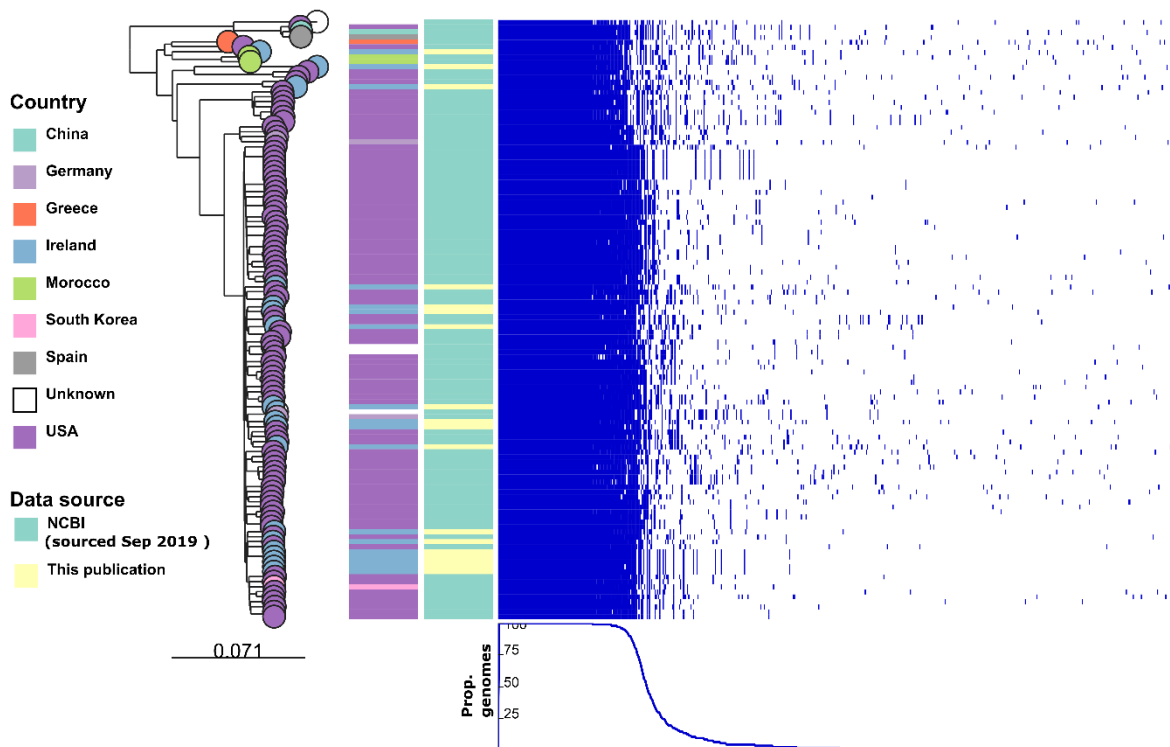

**Figure S1: *V. splendidus* gene family presence-absence in 120 isolates.** Gene presence-absence for 18 *V. splendidus* isolates and 102 isolates identified as *V. splendidus* on the NCBI. The country of isolation is indicated in the tree leaves and the first metadata column. A second column indicates the Data source of each isolate. A heatmap is shown alongside the tree where dark blue indicates the presence of a gene family in a genome. The heatmap is ordered by the proportion of genomes containing each gene family which is plotted underneath.

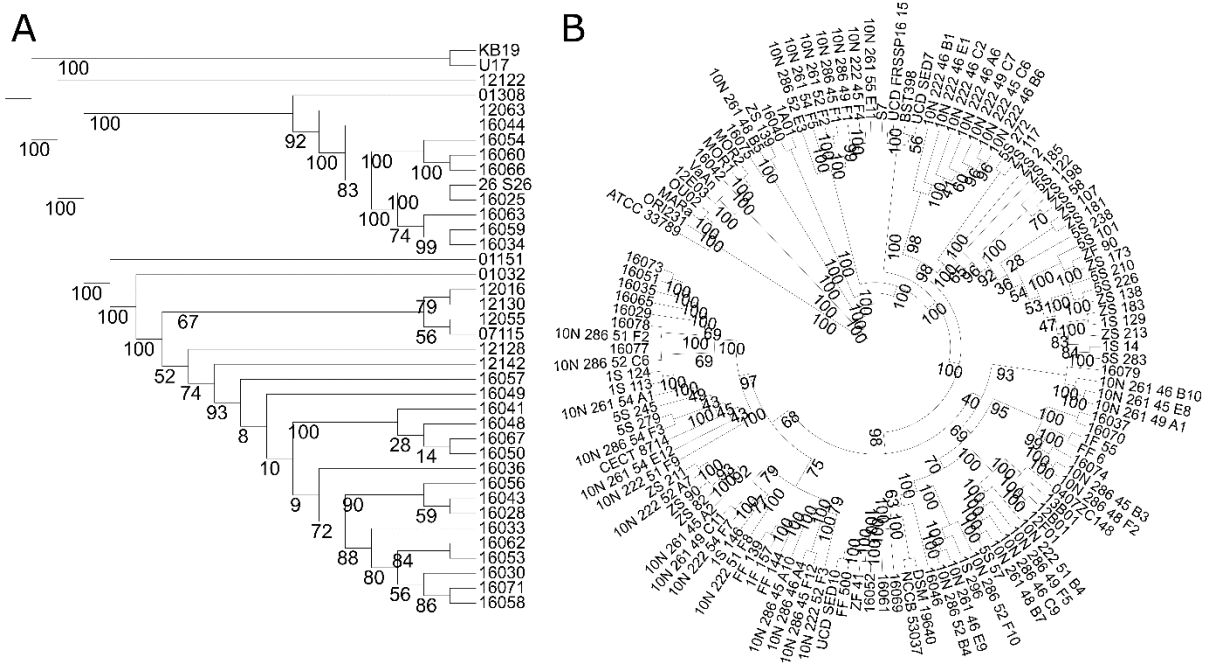

**Figure S2: Phylogenetic trees with bootstrap values added.** A) An ML tree of 38 *V. aestuarianus* isolates as shown in Figure 2 with branch lengths removed and bootstrap values added. B) A Neighbour-Joining tree of 120 *V. splendidus* species complex isolates as shown in Figure 4 with branch lengths removed and bootstrap values added.
